# Supplementary material
Source: publisher figshare collection journal article supplement (https://asha.figshare.com/ndownloader/files/17930621)
Supplement: Supplementary file 1 [file 17930621]

| Reference                        | Intervention     | Type       | Participants                                                                                                                                                | Test(s)                                                   | Intervention Conditions                                                                                                                                                                | Test Conditions                                                                                                                                                                                                                                                                                                                                                                                                                        | Results                                                                                                                                                                                                                                                                                                                                                                                             | Conclusions                                                                                                                                                                                                     | Comments                                                                                                                                                                          |
|----------------------------------|------------------|------------|-------------------------------------------------------------------------------------------------------------------------------------------------------------|-----------------------------------------------------------|----------------------------------------------------------------------------------------------------------------------------------------------------------------------------------------|----------------------------------------------------------------------------------------------------------------------------------------------------------------------------------------------------------------------------------------------------------------------------------------------------------------------------------------------------------------------------------------------------------------------------------------|-----------------------------------------------------------------------------------------------------------------------------------------------------------------------------------------------------------------------------------------------------------------------------------------------------------------------------------------------------------------------------------------------------|-----------------------------------------------------------------------------------------------------------------------------------------------------------------------------------------------------------------|-----------------------------------------------------------------------------------------------------------------------------------------------------------------------------------|
| Kenworthy, Klee, & Tharpe (1990) | RM<br>CROS       | Laboratory | 6 children (6–12 years old); normal hearing in one ear; moderate to profound hearing loss in one ear (PTAs range: 56 to > 120 dB HL)                        | Nonsense syllable recognition<br><br>Sentence recognition | 1) Unaided;<br>2) CROS (microphone on ear with hearing loss; receiver on ear with normal hearing);<br>3) RM (microphone near primary loudspeaker, receiver on ear with normal hearing) | In all conditions, speech level was 62 dB A and noise level was 56 dB A (+6 dB SNR)<br><br>1) <u>Monaural direct</u> (speech: +45° relative to ear with normal hearing; noise: +45° relative to ear with hearing loss);<br>2) <u>Monaural indirect</u> (speech: +45° relative to ear with hearing loss; noise: +45° relative to ear with normal hearing);<br>3) <u>Midline</u> (speech: 0°; noise: 135, 180, 225° relative to midline) | 1) <u>Monaural direct</u> : Significant detriment of CROS use relative to FM and unaided (~30 percentage points);<br>2) <u>Monaural indirect</u> : FM better than unaided (~55 percentage points); CROS better than unaided (~45 percentage points);<br>3) <u>Midline</u> : FM benefit (12 percentage points) and CROS detriment (11 percentage points) relative to unaided with nonsense syllables | 1) RM provides most consistent benefits<br>2) CROS only provides benefits in monaural indirect conditions<br>3) CROS can significantly impair speech recognition in monaural direct and some midline conditions | Stimuli were prerecorded, limiting the role of head movement<br><br>RM microphone was always near the speech loudspeaker<br><br>Noise was mostly directional, rather than diffuse |
| Miller (1967)                    | CROS (body worn) | Survey     | 13 children (7–13 years old); normal hearing in one ear; moderate to severe hearing loss in one ear; demonstrated listening difficulties at home and school | Parent and teacher report                                 | CROS system with body aid positioned on the shoulder near the ear with hearing loss; custom earmold with snap ring and maximum venting                                                 | Teachers and parents reported on participants' progress relative to unaided after 1 semester of CROS use                                                                                                                                                                                                                                                                                                                               | 12 of 13 children demonstrated "favorable adjustment"<br><br>Teachers reported greater alertness of children and fewer misunderstandings<br><br>Children reported better sound awareness                                                                                                                                                                                                            | CROS systems can provide benefits and should be considered an option for children with unilateral hearing loss                                                                                                  | Evidence is difficult to interpret because data are not presented and methodology details are missing                                                                             |

|                                                                     |                      |                   |                                                                                                                                                                                                                                                              |                                                                                                                                     |                                                                                                                                                           |                                                                                                                                                                                                                               |                                                                                                                                                                                                                                                                                                                                                                                         |                                                                                                                                                                                                        |                                                                                                                                                                                                            |
|---------------------------------------------------------------------|----------------------|-------------------|--------------------------------------------------------------------------------------------------------------------------------------------------------------------------------------------------------------------------------------------------------------|-------------------------------------------------------------------------------------------------------------------------------------|-----------------------------------------------------------------------------------------------------------------------------------------------------------|-------------------------------------------------------------------------------------------------------------------------------------------------------------------------------------------------------------------------------|-----------------------------------------------------------------------------------------------------------------------------------------------------------------------------------------------------------------------------------------------------------------------------------------------------------------------------------------------------------------------------------------|--------------------------------------------------------------------------------------------------------------------------------------------------------------------------------------------------------|------------------------------------------------------------------------------------------------------------------------------------------------------------------------------------------------------------|
| <p>Noh &amp; Park (2012)</p>                                        | <p>Seating</p>       | <p>Laboratory</p> | <p>1) 25 children (10–19 years) with <u>unilateral hearing loss</u>; normal hearing in one ear; PTA greater than 60 dB HL in the other ear<br/>2) 25 children with <u>normal hearing</u> (10–19 years)<br/>3) 25 young adults with <u>normal hearing</u></p> | <p>Nonsense syllable recognition (Korean)</p>                                                                                       | <p>Speech loudspeaker 3 m from participant (58.3 dB A); in quiet<br/><br/>Speech loudspeaker 3 m, 4 m, 6 m, 8 m, and 10 m from participant; in babble</p> | <p>In all conditions, speech loudspeaker was midline (0°) and presented speech 65 dB A at 1 m; noise level was 55 dB A; speech levels varied with listener distance (58.5 to 52.5 dB); conference room with RT60 = 430 ms</p> | <p>1) Children with hearing loss were more sensitive to the effects of noise at 3m (10.2%) compared to adults and children (4.8% and 3.8%, respectively)<br/>2) Children with normal hearing outperformed their peers with hearing loss at all loudspeaker locations.<br/>3) To achieve 80% speech recognition, a student with unilateral hearing loss would need to sit within 3 m</p> | <p>Children with limited useable hearing unilaterally need to be seated closer to the teacher (within 6.3 m) to perform similarly in noise to their peers with normal hearing</p>                      | <p>Preferential seating focused on the teacher as the signal of interest<br/><br/>Moving the child closer to the teacher will move them farther from peers, who are also potential talkers of interest</p> |
| <p>Purcell, Jones-Goodrich, Wisneski, Edwards, &amp; Sie (2016)</p> | <p>Amplification</p> | <p>Survey</p>     | <p>50 families of children 5–19 years; children had normal hearing in one ear and mild ranging to profound, permanent hearing loss in the other ear</p>                                                                                                      | <p>Questionnaires regarding amplification use completed by families<br/><br/>Interviews with children 16 children (11–19 years)</p> | <p>Children were fit with conventional amplification, CROS, or RM systems as deemed appropriate based on their hearing status</p>                         | <p>n/a</p>                                                                                                                                                                                                                    | <p>1) 80% had access to preferential seating<br/>2) 40% reported use of FM systems<br/>3) 50% reported difficulties associated with preferential seating<br/>4) 68% of children tried amplification<br/>5) CROS retention rate was 69%<br/>6) Most common reason for lack of use was discomfort (47%), followed by lack of benefit (33%)</p>                                            | <p>1) Retention rates are relatively high and independent of degree of hearing loss<br/>2) CROS useful if unilateral hearing loss is severe-profound and/or word recognition scores worse than 60%</p> | <p>Highlights the risk of "low cost" interventions, such as the social stigma associated with preferential seating</p>                                                                                     |

|                |                                    |            |                                                                                                                                                                                                            |                                                                                |                                                                                                                                            |                                                                                                                                                                                                                               |                                                                                                                                                                                                                                                                                                                                                                                                       |                                                                                                                                                                                       |                                                                                                                                                                                         |
|----------------|------------------------------------|------------|------------------------------------------------------------------------------------------------------------------------------------------------------------------------------------------------------------|--------------------------------------------------------------------------------|--------------------------------------------------------------------------------------------------------------------------------------------|-------------------------------------------------------------------------------------------------------------------------------------------------------------------------------------------------------------------------------|-------------------------------------------------------------------------------------------------------------------------------------------------------------------------------------------------------------------------------------------------------------------------------------------------------------------------------------------------------------------------------------------------------|---------------------------------------------------------------------------------------------------------------------------------------------------------------------------------------|-----------------------------------------------------------------------------------------------------------------------------------------------------------------------------------------|
| Shapiro (1977) | CROS                               | Survey     | 10 children (7–17 years) who were fit with CROS system; normal hearing in one ear; hearing loss greater than 55 dB in the other ear; identified as having as having difficulty in school                   | CROS use rate and parent-reported benefit for academics and/or social behavior | Children were fit with CROS following a trial period<br><br>Surveys were mailed to the families                                            | Retrospective reports of changes seen with CROS systems                                                                                                                                                                       | 1) 8 of 9 remaining participants were considered "successful" users of CROS or BiCROS<br>2) 1 of 9 participants did not do well with amplification<br>3) Half of the participants' families returned the questionnaire— children wore CROS at school and sometimes at home; all parents reported they would recommend the system                                                                      | CROS systems can provide benefits for children with "unaidable" hearing in one ear<br><br>CROS should be used at school full-time and at home if desired by the child                 | Selection bias evident; only those exhibiting difficulty in school and those who exhibited benefit during a trial period were fit with CROS; "difficulty in school" not clearly defined |
| Updike (1994)  | CROS, RM, conventional hearing aid | Laboratory | 6 children with unilateral hearing loss (5–12 years); normal hearing in one ear and unilateral hearing loss in the other ear (1 mild, 1 moderate, 1 moderately severe, 1 severe, and 2 profound in degree) | Word recognition performance with closed set response                          | 1) Unaided;<br>2) Hearing aid (only for 4 participants);<br>3) CROS;<br>4) RM (microphone near primary loudspeaker, circumaural headphone) | In all conditions, speech level was 77 dB SPL and noise level was 71 dB SPL (+6 dB SNR)<br><br>1) <u>Quiet</u> (speech at 0°, 4.5 m from participant)<br>2) <u>Noise</u> (speech at 0°, speech-shaped noise at +90 and +270°) | FM improved word recognition in <u>noise</u> for all 6 participants and in <u>quiet</u> for 3 participants<br><br>CROS improved word recognition in <u>quiet</u> for 1 participant (mild loss) and impaired performance for 1 participant (moderately severe loss)<br><br>CROS significantly impaired word recognition in <u>noise</u> for 2 participants and improved performance for 0 participants | 1) Fitting CROS does not enhance speech recognition and can make it worse in noisy environments<br>2) RM system significant improved word recognition, especially in background noise | Directional noise<br><br>Speech loudspeaker in front with RM microphone near the loudspeaker of interest                                                                                |

Note. RM = remote microphone systems; CROS = contralateral routing of signal aids; SNR = signal-to-noise ratio; FM = frequency modulation; BiCROS = bilateral microphones with contralateral routing of signal.

## References

- Kenworthy, O., Klee, T., & Tharpe, A. (1990). Speech recognition ability of children with unilateral sensorineural hearing loss as a function of amplification, speech stimuli and listening condition. *Ear and Hearing, 11*, 264–270.
- Miller, A. L. (1967). Body type hearing aids for unilateral hearing losses. *Journal of Speech and Hearing Disorders, 32*, 268–269.
- Noh, H., & Park, Y.-G. (2012). How close should a student with unilateral hearing loss stay to a teacher in a noisy classroom. *International Journal of Audiology, 51*, 426–432.
- Purcell, P. L., Jones-Goodrich, R., Wisneski, M., Edwards, T. C., & Sie, K. C. (2016). Hearing devices for children with unilateral hearing loss: Patient- and parent-reported perspectives. *International Journal of Pediatric Otorhinolaryngology, 90*, 43–48.
- Shapiro, I. (1977). Children's use of CROS hearing aids. *Archives of Otolaryngology (Chicago, Ill.: 1960), 103*, 712–716.
- Updike, C. D. (1994). Comparison of FM auditory trainers, CROS aids, and personal amplification in unilaterally hearing impaired children. *Journal of the American Academy of Audiology, 5*, 204–209.
